# Supplementary material for: Standardized Pomegranate (Pomella®) and Red Maple (Maplifa®) Extracts and Their Phenolics Protect Type I Collagen by the Inhibition of Matrix Metalloproteinases, Collagenase, and Collagen Cross-Linking
Source: MDPI journal article supplement (doi:10.3390/molecules27227919), 2022-11-16
Supplement: s1 [file s1]

## SUPPLEMENTARY MATERIALS

### **Standardized Pomegranate (Pomella®) and Red Maple (Maplifa®) Extracts and their Phenolics Protect Type I Collagen by the Inhibition of Matrix Metalloproteinases, Collagenase, and Collagen Cross-linking**

**Huifang Li<sup>1,2†</sup>, Tithi Roy<sup>3†</sup>, Samuel T. Boateng<sup>3</sup>, Hao He<sup>1,2</sup>, Chang Liu<sup>2</sup>, Weixi Liu<sup>2</sup>, Dongli Li<sup>1</sup>, Panpan Wu<sup>1</sup>, Navindra P. Seeram<sup>2</sup>, Jean Christopher Chamcheu<sup>3\*</sup>, and Hang Ma<sup>1,2\*</sup>**

<sup>1</sup> School of Biotechnology and Health Sciences, Wuyi University; International Healthcare Innovation Institute (Jiangmen), Jiangmen 529020, China

<sup>2</sup> Bioactive Botanical Research Laboratory, Department of Biomedical and Pharmaceutical Sciences, College of Pharmacy, University of Rhode Island, Kingston, RI 02881, USA

<sup>3</sup> School of Basic Pharmaceutical and Toxicological Sciences, College of Pharmacy, University of Louisiana at Monroe, Monroe, LA 71209, USA

† These authors contributed equally to this work.

\* Correspondence: [chamcheu@ulm.edu](mailto:chamcheu@ulm.edu); Tel: +1318-342-6820 (J.C.C.); [hang\\_ma@uri.edu](mailto:hang_ma@uri.edu); Tel.: +1-401-874-2711 (H.M.)

## LIST OF CONTENTS

|                                                                                                                                                                                          |    |
|------------------------------------------------------------------------------------------------------------------------------------------------------------------------------------------|----|
| <b>Figure S1.</b> The cell viability at four (4) different concentration against A431 and NTERT1 for Maplifa®, Pomella®, GA, PA and their combinations.                                  |    |
| <b>Figure S2.</b> Total ion chromatograms of Pomella® in liquid chromatography coupled with time-of-flight tandem mass spectrometry (LC-TOF-MS/MS).....                                  | 3  |
| <b>Figure S3.</b> Total ion chromatogram of Maplifa® in ultra-fast liquid chromatography coupled with electrospray ionization/time-of-flight mass spectrometry (UFLC-ESI-TOF-MS/MS)..... | 4  |
| <b>Table S1.</b> Characterization of phenolic compounds in Pomella® by LC-TOF-MS/MS.....                                                                                                 | 6  |
| <b>Table S2.</b> Characterization of phenolic compounds in a methanolic extract red maple leaves and Maplifa® by LC-ESI-TOF-MS/MS.....                                                   | 12 |

1 Figure S1. The cell viability of Maplifa<sup>®</sup>, Pomella<sup>®</sup>, GA and PA at 12.5, 25, 50 and 100  $\mu$ g/ml or  $\mu$ M in A431(A) and NTERT1(B).

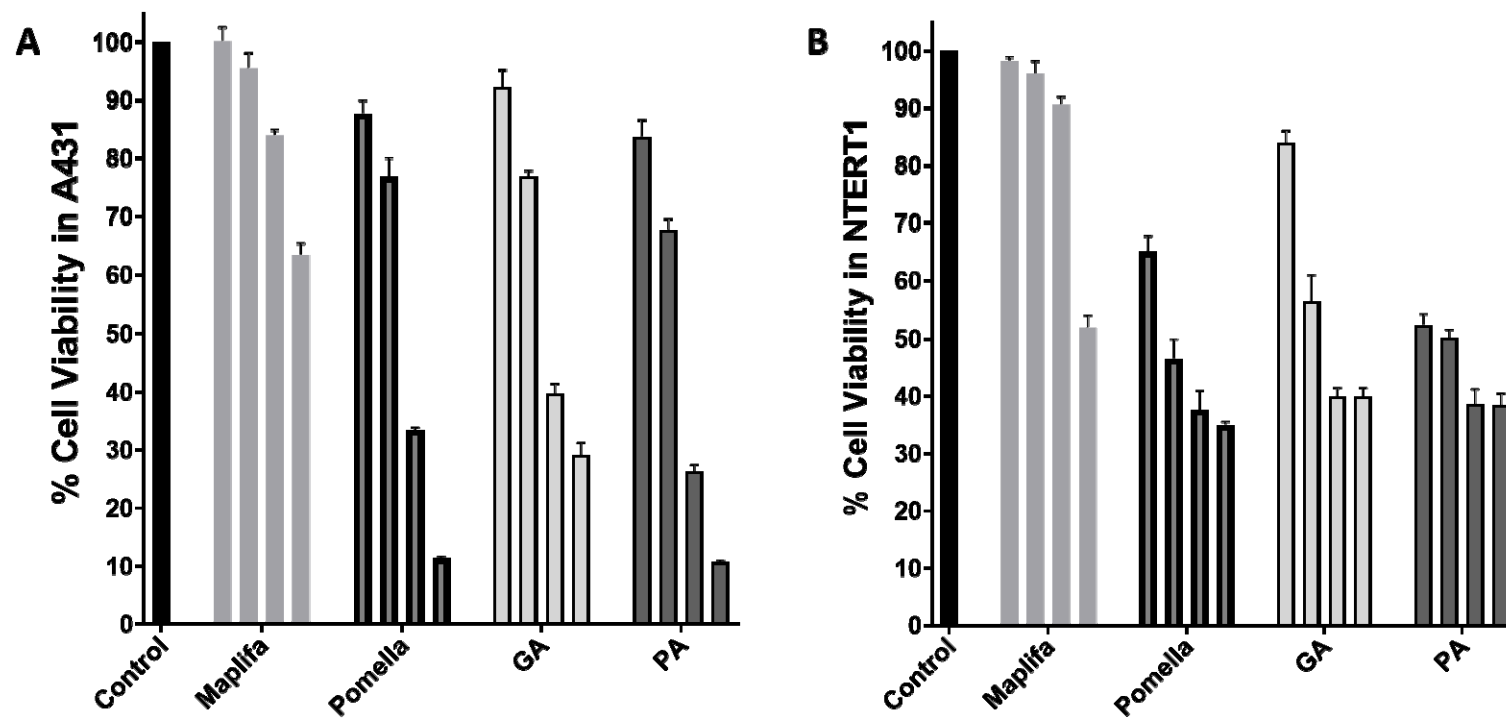

6 **Figure S2.** Total ion chromatograms of Pomella® in liquid chromatography coupled with time-of-flight tandem mass spectrometry (LC-TOF-  
7 MS/MS).

8

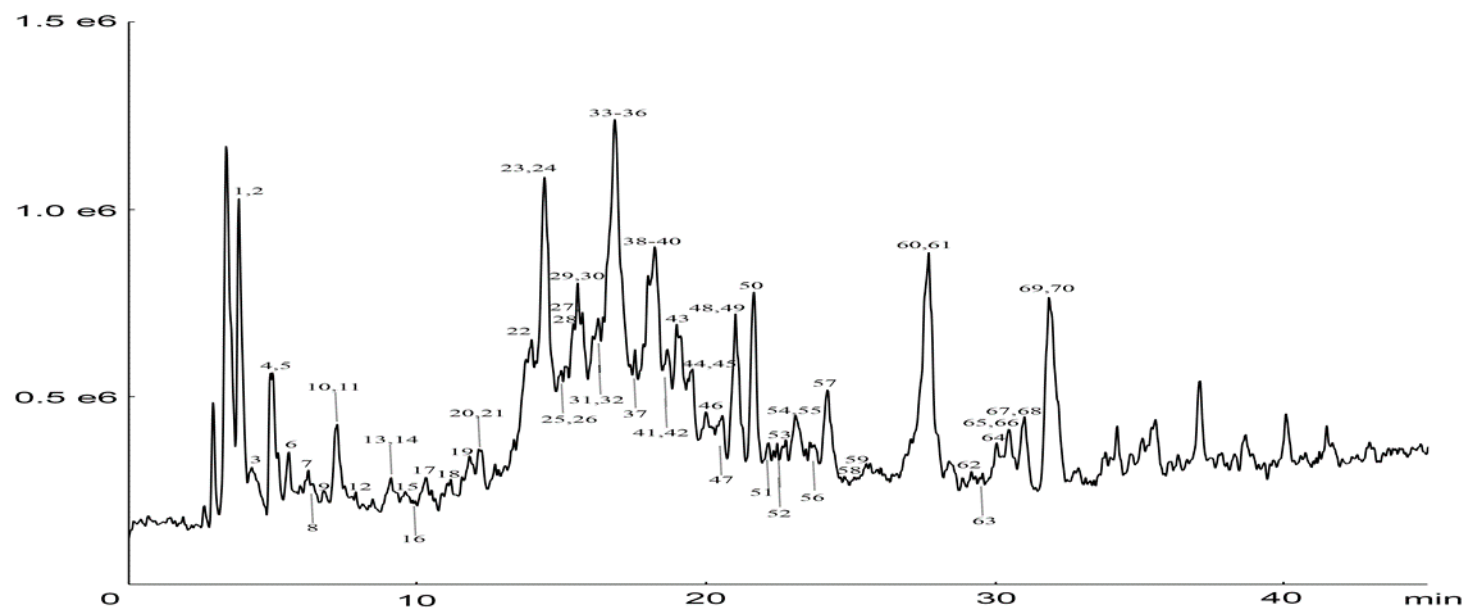

11 **Figure S3.** Total ion chromatogram of Maplifa<sup>®</sup> in ultra-fast liquid chromatography coupled with electrospray ionization/time-of-flight mass  
12 spectrometry.

13

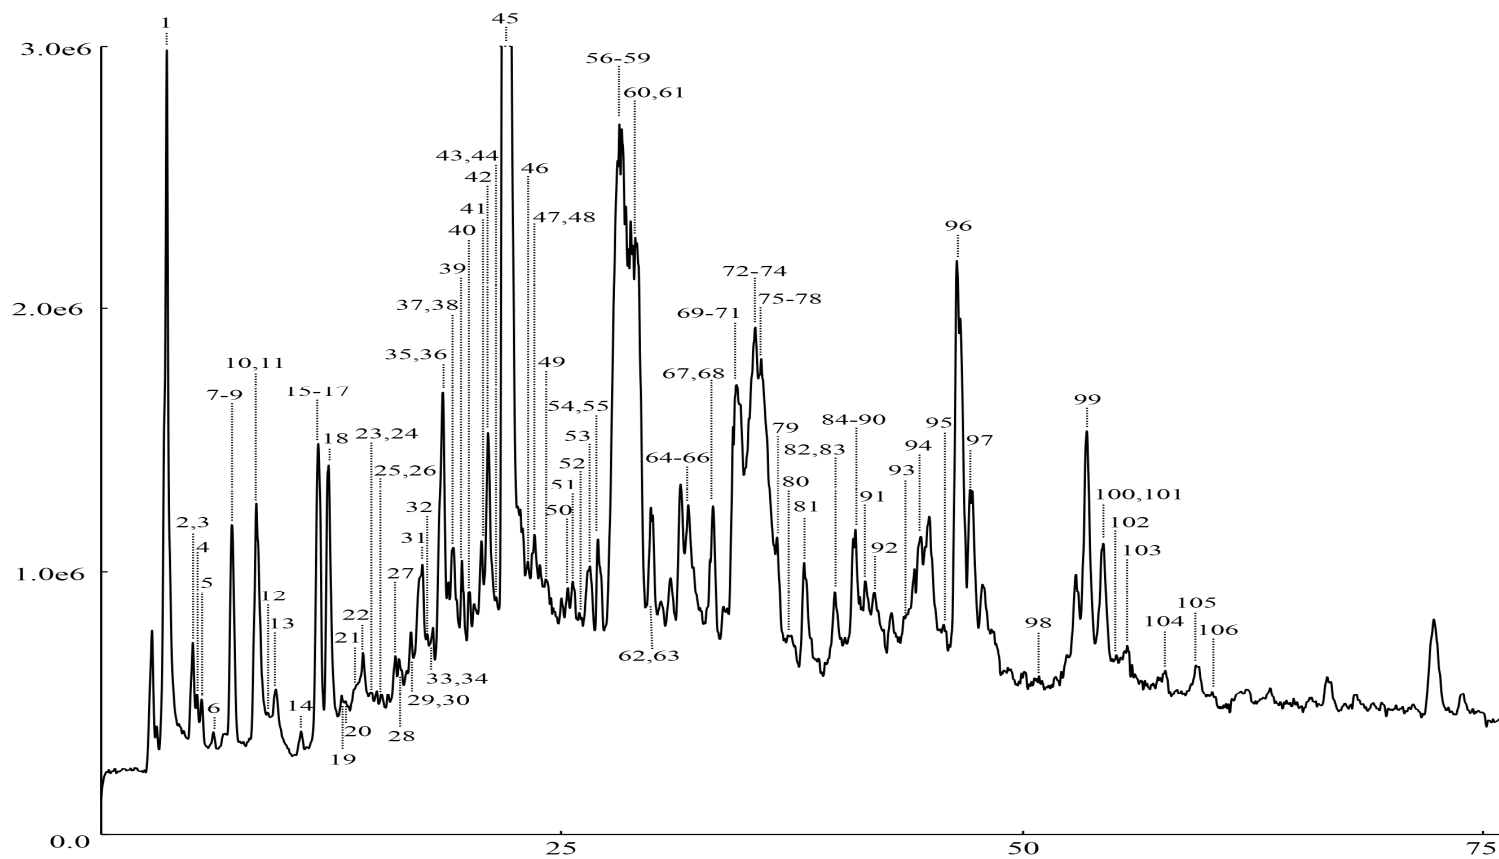

14 **Table S1.** Characterization of phenolic compounds in Pomella® by LC-TOF-MS/MS.

| No | t <sub>R</sub><br>(min) | Molecular<br>formula                            | HR-ESI(-)-MS<br>[M-H] <sup>-</sup> <i>m/z</i><br>exptl. (theor.) | Error<br>(ppm) | Major MS/MS ions        | Identification               |
|----|-------------------------|-------------------------------------------------|------------------------------------------------------------------|----------------|-------------------------|------------------------------|
| 1  | 3.80                    | C <sub>20</sub> H <sub>18</sub> O <sub>14</sub> | 481.0631<br>(481.0623)                                           | 1.4983         | 301, 275, 257, 229      | HHDP-hexoside                |
| 2  | 3.92                    | C <sub>13</sub> H <sub>16</sub> O <sub>10</sub> | 331.0678<br>(331.0670)                                           | 2.2032         | 271, 211, 169, 125      | galloyl-hexoside             |
| 3  | 4.40                    | C <sub>20</sub> H <sub>18</sub> O <sub>14</sub> | 481.0627<br>(481.0623)                                           | 0.6668         | 301, 275, 257, 229      | HHDP-hexoside                |
| 4  | 4.88                    | C <sub>20</sub> H <sub>18</sub> O <sub>14</sub> | 481.0624<br>(481.0623)                                           | 0.0431         | 301, 275, 257, 229      | HHDP-hexoside                |
| 5  | 4.99                    | C <sub>13</sub> H <sub>16</sub> O <sub>10</sub> | 331.0680<br>(331.0670)                                           | 2.8073         | 271, 211, 169, 125      | galloyl-hexoside             |
| 6  | 5.47                    | C <sub>13</sub> H <sub>16</sub> O <sub>10</sub> | 331.0675<br>(331.0670)                                           | 1.2970         | 271, 211, 169, 125      | galloyl-hexoside             |
| 7  | 6.17                    | C <sub>13</sub> H <sub>16</sub> O <sub>10</sub> | 331.0678<br>(331.0670)                                           | 2.2032         | 271, 211, 169, 125      | galloyl-hexoside             |
| 8  | 6.36                    | C <sub>27</sub> H <sub>22</sub> O <sub>19</sub> | 649.0684<br>(649.0682)                                           | 0.2271         | 497, 301, 275, 229, 195 | galloyl-HHDP-<br>glucuronide |

|    |       |                                                 |                          |         |                                                                            |                          |
|----|-------|-------------------------------------------------|--------------------------|---------|----------------------------------------------------------------------------|--------------------------|
| 9  | 6.82  | C <sub>27</sub> H <sub>22</sub> O <sub>18</sub> | 633.0732<br>(633.0733)   | -0.2178 | 481, 463, 421, 301, 275, 257, 249, 229                                     | galloyl-HHDP-hexoside    |
| 10 | 7.15  | C <sub>7</sub> H <sub>6</sub> O <sub>5</sub>    | 169.0155<br>(169.0142)   | 7.4136  | 125                                                                        | gallic acid              |
| 11 | 7.20  | C <sub>13</sub> H <sub>16</sub> O <sub>10</sub> | 331.0676<br>(331.0670)   | 1.5991  | 271, 211, 169, 125                                                         | galloyl-hexoside         |
| 12 | 7.74  | C <sub>34</sub> H <sub>22</sub> O <sub>22</sub> | 781.0524<br>(781.0529)   | -0.7637 | 721, 601, 575, 449, 393, 301, 300, 299, 271, 245, 229                      | gallagyl-hexoside        |
| 13 | 9.09  | C <sub>48</sub> H <sub>28</sub> O <sub>30</sub> | 1083.0579<br>(1083.0592) | -1.2592 | 1065, 807, 781, 763, 721, 601, 575, 549, 341, 301, 300, 299, 275, 273, 271 | HHDP-gallagyl-hexoside*  |
| 14 | 9.10  | C <sub>27</sub> H <sub>22</sub> O <sub>18</sub> | 633.0737<br>(633.0733)   | 0.5719  | 481, 463, 301, 275, 257, 249, 229                                          | galloyl-HHDP-hexoside    |
| 15 | 9.60  | C <sub>34</sub> H <sub>24</sub> O <sub>22</sub> | 783.0684<br>(783.0686)   | -0.3148 | 481, 437, 419, 341, 329, 301, 299, 275, 257, 229                           | Bis-HHDP-hexoside        |
| 16 | 9.83  | C <sub>27</sub> H <sub>22</sub> O <sub>19</sub> | 649.0684<br>(649.0682)   | 0.2271  | 497, 301, 284, 275, 229, 195                                               | galloyl-HHDP-glucuronide |
| 17 | 10.31 | C <sub>48</sub> H <sub>28</sub> O <sub>30</sub> | 1083.0586<br>(1083.0592) | -0.6129 | 807, 781, 763, 721, 601, 575, 549, 341, 301, 300, 299, 275, 273, 271       | HHDP-gallagyl-hexoside*  |
| 18 | 10.93 | C <sub>13</sub> H <sub>16</sub> O <sub>10</sub> | 331.0675<br>(331.0670)   | 1.2970  | 169, 125                                                                   | galloyl-hexoside         |
| 19 | 11.86 | C <sub>34</sub> H <sub>24</sub> O <sub>22</sub> | 783.0680                 | -0.8257 | 481, 301, 275, 257, 229                                                    | Bis-HHDP-hexoside        |

|    |       |                                                 |                          |         |                                                            |                                 |
|----|-------|-------------------------------------------------|--------------------------|---------|------------------------------------------------------------|---------------------------------|
|    |       |                                                 | (783.0686)               |         |                                                            |                                 |
| 20 | 12.08 | C <sub>41</sub> H <sub>26</sub> O <sub>26</sub> | 933.0622<br>(933.0639)   | -1.8811 | 781, 763, 721, 601, 575, 549, 449, 393, 301, 300, 299, 271 | galloyl-gallagyl-hexoside       |
| 21 | 12.21 | C <sub>15</sub> H <sub>14</sub> O <sub>7</sub>  | 305.0674<br>(305.0666)   | 2.7313  | 261, 221, 179, 167, 165, 137, 125, 109                     | gallocatechin/epigallo catechin |
| 22 | 13.80 | C <sub>27</sub> H <sub>22</sub> O <sub>18</sub> | 633.0737<br>(633.0733)   | 0.5719  | 481, 463, 421, 301, 275, 257, 249, 229                     | galloyl-HHDP-hexoside           |
| 23 | 14.25 | C <sub>21</sub> H <sub>10</sub> O <sub>13</sub> | 469.0056<br>(469.0048)   | 1.5687  | 425, 407, 379, 300, 279, 251, 195                          | valoneic acid bilactone         |
| 24 | 14.39 | C <sub>48</sub> H <sub>28</sub> O <sub>30</sub> | 1083.0581<br>(1083.0592) | -1.0746 | 781, 721, 601, 575, 549, 301, 300, 299, 275, 273, 271      | HHDP-gallagyl-hexoside*         |
| 25 | 14.94 | C <sub>27</sub> H <sub>22</sub> O <sub>18</sub> | 633.0737<br>(633.0733)   | 0.5719  | 481, 463, 421, 301, 275, 257, 249, 229                     | galloyl-HHDP-hexoside           |
| 26 | 15.02 | C <sub>20</sub> H <sub>20</sub> O <sub>14</sub> | 483.0785<br>(483.0780)   | 0.9743  | 423, 405, 331, 313, 271, 241, 211, 169, 125                | digalloyl-hexoside              |
| 27 | 15.34 | C <sub>20</sub> H <sub>20</sub> O <sub>14</sub> | 483.0775<br>(483.0780)   | -1.0956 | 423, 331, 313, 271, 211, 169, 125                          | digalloyl-hexoside              |
| 28 | 15.39 | C <sub>41</sub> H <sub>28</sub> O <sub>27</sub> | 951.0735<br>(951.0745)   | -1.0724 | 907, 783, 605, 481, 425, 301, 275, 257, 249, 229           | HHDP-valoneoyl-hexoside         |
| 29 | 15.47 | C <sub>27</sub> H <sub>22</sub> O <sub>18</sub> | 633.0736<br>(633.0733)   | 0.4139  | 481, 463, 421, 301, 275, 257, 249, 229                     | galloyl-HHDP-hexoside           |



|    |       |                                                 |                          |         |                                                                 |                         |
|----|-------|-------------------------------------------------|--------------------------|---------|-----------------------------------------------------------------|-------------------------|
| 30 | 15.83 | C <sub>34</sub> H <sub>24</sub> O <sub>22</sub> | 783.0676<br>(783.0686)   | -1.3365 | 481, 301, 275, 257, 229                                         | Bis-HHDP-hexoside       |
| 31 | 16.15 | C <sub>20</sub> H <sub>20</sub> O <sub>14</sub> | 483.0793<br>(483.0780)   | 2.6304  | 423, 331, 313, 271, 211, 169, 125                               | digalloyl-hexoside      |
| 32 | 16.44 | C <sub>20</sub> H <sub>20</sub> O <sub>14</sub> | 483.0785<br>(483.0780)   | 0.9743  | 423, 331, 313, 271, 241, 211, 193, 169, 125                     | digalloyl-hexoside      |
| 33 | 16.57 | C <sub>27</sub> H <sub>22</sub> O <sub>18</sub> | 633.0731<br>(633.0733)   | -0.3758 | 481, 301, 275, 257, 249, 229                                    | galloyl-HHDP-hexoside   |
| 34 | 16.79 | C <sub>48</sub> H <sub>28</sub> O <sub>30</sub> | 1083.0587<br>(1083.0592) | -0.5206 | 781, 721, 601, 575, 549, 301, 300, 299, 275, 273, 271           | HHDP-gallagyl-hexoside* |
| 35 | 17.06 | C <sub>20</sub> H <sub>20</sub> O <sub>14</sub> | 483.0785<br>(483.0780)   | 0.9743  | 331, 313, 271, 211, 169, 125                                    | digalloyl-hexoside      |
| 36 | 17.15 | C <sub>34</sub> H <sub>26</sub> O <sub>22</sub> | 785.0836<br>(785.0842)   | -0.8873 | 615, 483, 463, 419, 331, 313, 301, 275, 257, 249, 229, 169, 125 | digalloyl-HHDP-hexoside |
| 37 | 17.53 | C <sub>20</sub> H <sub>20</sub> O <sub>14</sub> | 483.0787<br>(483.0780)   | 1.3883  | 439, 331, 313, 287, 169, 125                                    | digalloyl-hexoside      |
| 38 | 17.79 | C <sub>20</sub> H <sub>20</sub> O <sub>14</sub> | 483.0785<br>(483.0780)   | 0.9743  | 331, 313, 271, 211, 169, 125                                    | digalloyl-hexoside      |
| 39 | 18.02 | C <sub>27</sub> H <sub>24</sub> O <sub>18</sub> | 635.0869<br>(635.0889)   | -3.2877 | 483, 465, 423, 313, 295, 271, 235, 211, 193, 169, 125           | trigalloyl-hexoside     |
| 40 | 18.34 | C <sub>27</sub> H <sub>22</sub> O <sub>18</sub> | 633.0737                 | 0.5719  | 481, 463, 421, 301, 275, 257, 249, 229                          | galloyl-HHDP-           |

|    |       |                                                 |                        |         |                                                                      |                            |
|----|-------|-------------------------------------------------|------------------------|---------|----------------------------------------------------------------------|----------------------------|
|    |       |                                                 | (633.0733)             |         |                                                                      | hexoside                   |
| 41 | 18.57 | C <sub>8</sub> H <sub>8</sub> O <sub>5</sub>    | 183.0313<br>(183.0298) | 7.6650  | 168, 140, 124                                                        | methyl gallic acid         |
| 42 | 18.69 | C <sub>34</sub> H <sub>26</sub> O <sub>23</sub> | 801.0772<br>(801.0792) | -2.5107 | 649, 499, 347, 301, 275, 229, 195                                    | digalloyl-HHDP-glucuronide |
| 43 | 19.04 | C <sub>41</sub> H <sub>28</sub> O <sub>26</sub> | 935.0781<br>(935.0796) | -1.6098 | 917, 783, 633, 571, 481, 419, 329, 301, 275, 257, 249, 231, 169, 125 | galloyl-bis-HHDP-hexoside  |
| 44 | 19.27 | C <sub>27</sub> H <sub>22</sub> O <sub>18</sub> | 633.0730<br>(633.0733) | -0.5338 | 481, 463, 421, 301, 275, 257, 249, 229                               | galloyl-HHDP-hexoside      |
| 45 | 19.43 | C <sub>13</sub> H <sub>8</sub> O <sub>8</sub>   | 291.0152<br>(291.0146) | 1.9209  | 247, 219, 191                                                        | Brevifolin carboxylic acid |
| 46 | 19.92 | C <sub>27</sub> H <sub>24</sub> O <sub>18</sub> | 635.0886<br>(635.0889) | -0.6109 | 483, 465, 423, 331, 313, 295, 271, 211, 169, 125                     | trigalloyl-hexoside        |
| 47 | 20.69 | C <sub>34</sub> H <sub>26</sub> O <sub>22</sub> | 785.0839<br>(785.0842) | -0.5022 | 615, 483, 463, 419, 331, 313, 301, 275, 257, 249, 229, 169, 125      | digalloyl-HHDP-hexoside    |
| 48 | 21.00 | C <sub>37</sub> H <sub>28</sub> O <sub>23</sub> | 839.0926<br>(839.0948) | -2.6950 | 537, 519, 479, 461, 435, 301, 273, 257, 229                          | pomellatannin              |
| 49 | 21.01 | C <sub>27</sub> H <sub>24</sub> O <sub>18</sub> | 635.0886<br>(635.0889) | -0.6109 | 483, 465, 313, 169, 125                                              | trigalloyl-hexoside        |
| 50 | 21.49 | C <sub>27</sub> H <sub>22</sub> O <sub>18</sub> | 633.0737<br>(633.0733) | -0.5338 | 481, 463, 421, 301, 275, 257, 249, 229                               | galloyl-HHDP-hexoside      |

|    |       |                                                 |                        |         |                                                                      |                             |
|----|-------|-------------------------------------------------|------------------------|---------|----------------------------------------------------------------------|-----------------------------|
| 51 | 22.20 | C <sub>27</sub> H <sub>24</sub> O <sub>18</sub> | 635.0882<br>(635.0889) | -1.2408 | 483, 465, 313, 211, 169, 125                                         | trigalloyl-hexoside         |
| 52 | 22.52 | C <sub>34</sub> H <sub>26</sub> O <sub>22</sub> | 785.0802<br>(785.0842) | -5.2181 | 615, 483, 463, 419, 331, 313, 301, 275, 257, 249, 229, 169, 125      | digalloyl-HHDP-hexoside     |
| 53 | 22.68 | C <sub>21</sub> H <sub>10</sub> O <sub>13</sub> | 469.0051<br>(469.0048) | 0.5026  | 425, 407, 301, 300, 299, 271, 243                                    | valoneic acid bilactone     |
| 54 | 22.94 | C <sub>27</sub> H <sub>24</sub> O <sub>18</sub> | 635.0881<br>(635.0889) | -1.3982 | 483, 465, 313, 295, 271, 211, 169, 125                               | trigalloyl-hexoside         |
| 55 | 23.14 | C <sub>20</sub> H <sub>16</sub> O <sub>13</sub> | 463.0514<br>(481.0518) | -0.4144 | 301, 300, 257, 229                                                   | ellagic acid-hexoside       |
| 56 | 23.81 | C <sub>27</sub> H <sub>24</sub> O <sub>18</sub> | 635.0893<br>(635.0889) | 0.4912  | 483, 465, 423, 331, 313, 295, 271, 221, 211, 169, 125                | trigalloyl-hexoside         |
| 57 | 24.25 | C <sub>20</sub> H <sub>16</sub> O <sub>13</sub> | 463.0515<br>(481.0518) | -0.3144 | 301, 300, 257, 229                                                   | ellagic acid-hexoside       |
| 58 | 24.73 | C <sub>34</sub> H <sub>26</sub> O <sub>22</sub> | 785.0863<br>(785.0842) | 2.5517  | 615, 483, 463, 419, 331, 313, 301, 275, 257, 249, 229, 169, 125      | digalloyl-HHDP-hexoside     |
| 59 | 25.62 | C <sub>27</sub> H <sub>24</sub> O <sub>18</sub> | 635.0885<br>(635.0889) | -0.7684 | 483, 465, 423, 313, 295, 271, 211, 169, 125                          | trigalloyl-hexoside         |
| 60 | 27.68 | C <sub>41</sub> H <sub>28</sub> O <sub>27</sub> | 951.0713<br>(951.0745) | -3.3855 | 933, 915, 897, 765, 631, 613, 463, 445, 301, 275, 257, 249, 229, 169 | galloyl-HHDP-DHHDP-hexoside |
| 61 | 29.16 | C <sub>19</sub> H <sub>14</sub> O <sub>12</sub> | 433.0411               | -0.3458 | 301, 300, 257, 229                                                   | ellagic acid pentoside      |

|    |       |                                                 |                        |         |                                                                                     |                            |
|----|-------|-------------------------------------------------|------------------------|---------|-------------------------------------------------------------------------------------|----------------------------|
|    |       |                                                 | (433.0412)             |         |                                                                                     |                            |
| 62 | 29.52 | C <sub>34</sub> H <sub>28</sub> O <sub>22</sub> | 787.0980<br>(787.0999) | -2.4733 | 635, 617, 483, 465, 447, 423, 313, 295, 249, 211, 169, 125                          | tetragalloyl-hexoside      |
| 63 | 30.45 | C <sub>19</sub> H <sub>14</sub> O <sub>12</sub> | 433.0408<br>(433.0412) | -1.0386 | 301, 300, 257, 229                                                                  | ellagic acid-pentoside     |
| 64 | 30.68 | C <sub>34</sub> H <sub>26</sub> O <sub>22</sub> | 785.0827<br>(785.0842) | -2.0337 | 615, 483, 463, 419, 331, 313, 301, 275, 257, 249, 229, 169, 125                     | digalloyl-HHDP-hexoside    |
| 65 | 30.89 | C <sub>34</sub> H <sub>28</sub> O <sub>22</sub> | 787.0971<br>(787.0999) | -3.6167 | 635, 617, 573, 465, 313, 295, 211, 169, 125                                         | tetragalloyl-hexoside      |
| 66 | 31.05 | C <sub>20</sub> H <sub>16</sub> O <sub>12</sub> | 447.0571<br>(447.0568) | 0.4476  | 301, 300, 257, 229                                                                  | ellagic acid-deoxyhexoside |
| 67 | 31.82 | C <sub>14</sub> H <sub>6</sub> O <sub>8</sub>   | 300.9986<br>(300.9989) | -1.2986 | 284, 257, 245, 229, 201, 185                                                        | ellagic acid               |
| 68 | 32.23 | C <sub>34</sub> H <sub>28</sub> O <sub>22</sub> | 787.0972<br>(787.0999) | -2.7467 | 617, 465, 449, 423, 313, 295, 169, 125                                              | tetragalloyl-hexoside      |
| 69 | 33.97 | C <sub>41</sub> H <sub>30</sub> O <sub>26</sub> | 937.0930<br>(937.0952) | -2.4067 | 785, 767, 635, 617, 597, 483, 465, 445, 419, 313, 301, 275, 257, 249, 229, 169, 125 | trigalloyl-HHDP-hexoside   |
| 70 | 35.61 | C <sub>41</sub> H <sub>32</sub> O <sub>26</sub> | 939.1076<br>(939.1109) | -3.5197 | 787, 769, 635, 617, 599, 465, 447, 431, 313, 295, 169, 125                          | pentagalloyl-hexoside      |

15 \* punicalagin isomers

16

17 **Table S2.** Characterization of phenolic compounds in a methanol extract red maple leaves and Maplifa™ by LC-ESI-TOF-MS/MS

| No | t <sub>R</sub><br>(min) | Formula                                         | HR-ESI(-)-MS<br>[M-H] <sup>-</sup> (m/z theor) | Error<br>(ppm) |                         | Identification      |
|----|-------------------------|-------------------------------------------------|------------------------------------------------|----------------|-------------------------|---------------------|
| 1  | 3.48                    | C <sub>7</sub> H <sub>12</sub> O <sub>6</sub>   | 191.0568 (191.0561)                            | 3.602          | 173, 155, 137, 127, 109 | quinic acid         |
| 2  | 4.85                    | C <sub>13</sub> H <sub>16</sub> O <sub>10</sub> | 331.0680 (331.0670)                            | 2.807          | 313, 271, 211, 169, 125 | galloyl hexoside    |
| 3  | 4.98                    | C <sub>14</sub> H <sub>16</sub> O <sub>10</sub> | 343.0687 (343.0670)                            | 4.749          | 191, 169, 125           | galloyl quinic acid |
| 4  | 5.23                    | C <sub>13</sub> H <sub>16</sub> O <sub>9</sub>  | 315.0729 (315.0721)                            | 2.362          | 169, 125                | maplexin A          |
| 5  | 5.49                    | C <sub>13</sub> H <sub>16</sub> O <sub>10</sub> | 331.0679 (331.0670)                            | 2.505          | 271, 211, 169, 125      | galloyl hexoside    |
| 6  | 6.17                    | C <sub>13</sub> H <sub>16</sub> O <sub>10</sub> | 331.0686 (331.0670)                            | 4.62           | 271, 211, 169, 125      | galloyl hexoside    |
| 7  | 6.9                     | C <sub>13</sub> H <sub>16</sub> O <sub>9</sub>  | 315.0735 (315.0721)                            | 4.266          | 169, 125                | maplexin B          |
| 8  | 7.06                    | C <sub>14</sub> H <sub>16</sub> O <sub>10</sub> | 343.0686 (343.0670)                            | 4.458          | 191, 169, 125           | galloyl quinic acid |
| 9  | 7.13                    | C <sub>7</sub> H <sub>6</sub> O <sub>5</sub>    | 169.0145 (169.0142)                            | 1.497          | 125                     | gallic acid         |

|    |      |                                                 |                     |       |                              |                                  |
|----|------|-------------------------------------------------|---------------------|-------|------------------------------|----------------------------------|
| 10 | 8.18 | C <sub>13</sub> H <sub>16</sub> O <sub>10</sub> | 331.0684 (331.0670) | 4.016 | 313, 241, 211, 169, 125      | galloyl hexoside                 |
| 11 | 8.44 | C <sub>14</sub> H <sub>16</sub> O <sub>10</sub> | 343.0682 (343.0670) | 3.292 | 191, 173, 169, 125           | 4- <i>O</i> -galloyl quinic acid |
| 12 | 9.01 | C <sub>13</sub> H <sub>16</sub> O <sub>10</sub> | 331.0687 (331.0670) | 4.922 | 313, 241, 169, 125           | galloyl hexoside                 |
| 13 | 9.46 | C <sub>13</sub> H <sub>16</sub> O <sub>9</sub>  | 315.0729 (315.0721) | 2.362 | 169, 125                     | galloyl deoxyhexoside            |
| 14 | 10.8 | C <sub>13</sub> H <sub>16</sub> O <sub>10</sub> | 331.0682 (331.0670) | 3.411 | 169, 125                     | galloyl hexoside                 |
| 15 | 11.6 | C <sub>14</sub> H <sub>14</sub> O <sub>9</sub>  | 325.0577 (325.0565) | 3.674 | 281, 173, 169, 125           | galloyl shikimic acid            |
| 16 | 11.8 | C <sub>13</sub> H <sub>16</sub> O <sub>9</sub>  | 315.0725 (315.0721) | 1.092 | 169, 125                     | ginnalin B                       |
| 17 | 12.4 | C <sub>13</sub> H <sub>16</sub> O <sub>9</sub>  | 315.0733 (315.0721) | 3.631 | 169, 125                     | ginnalin C                       |
| 18 | 13.1 | C <sub>14</sub> H <sub>18</sub> O <sub>10</sub> | 345.0843 (345.0827) | 4.577 | 183, 168, 124                | methylgalloyl hexoside           |
| 19 | 13.7 | C <sub>20</sub> H <sub>20</sub> O <sub>14</sub> | 483.0808 (483.0780) | 5.735 | 331, 313, 271, 211, 169, 125 | digalloyl hexoside               |
| 20 | 14.6 | C <sub>20</sub> H <sub>20</sub> O               | 483.0816 (483.0780) | 7.392 | 331, 271, 211, 169, 125      | digalloyl hexoside               |

|    |      |                                                 |                     |       |                                   |                       |  |
|----|------|-------------------------------------------------|---------------------|-------|-----------------------------------|-----------------------|--|
|    |      | 14                                              |                     |       |                                   |                       |  |
| 21 | 14.6 | C <sub>14</sub> H <sub>14</sub> O <sub>9</sub>  | 325.0577 (325.0565) | 3.674 | 173, 169, 125                     | galloyl shikimic acid |  |
| 22 | 15.2 | C <sub>20</sub> H <sub>20</sub> O <sub>14</sub> | 483.0810 (483.0780) | 6.149 | 331, 313, 271, 211, 169, 125      | digalloyl hexoside    |  |
| 23 | 16   | C <sub>21</sub> H <sub>20</sub> O <sub>14</sub> | 495.0817 (495.0780) | 7.414 | 343, 191, 169, 125                | digalloyl quinic acid |  |
| 24 | 16.2 | C <sub>14</sub> H <sub>14</sub> O <sub>9</sub>  | 325.0583 (325.0565) | 5.519 | 173, 169, 125                     | galloyl shikimic acid |  |
| 25 | 16.8 | C <sub>20</sub> H <sub>20</sub> O <sub>13</sub> | 467.0842 (467.0831) | 2.324 | 315, 297, 169, 125                | maplexin C            |  |
| 26 | 16.9 | C <sub>20</sub> H <sub>20</sub> O <sub>14</sub> | 483.0816 (483.0780) | 7.392 | 465, 331, 313, 271, 211, 169, 125 | digalloyl hexoside    |  |
| 27 | 17.4 | C <sub>21</sub> H <sub>20</sub> O <sub>14</sub> | 495.0806 (495.0780) | 5.192 | 343, 191, 173, 169, 125           | digalloyl quinic acid |  |
| 28 | 17.7 | C <sub>20</sub> H <sub>20</sub> O <sub>14</sub> | 483.0812 (483.0780) | 6.564 | 465, 331, 313, 271, 241, 169, 125 | digalloyl hexoside    |  |
| 29 | 18   | C <sub>15</sub> H <sub>14</sub> O <sub>6</sub>  | 289.0722 (289.0717) | 1.515 | 245, 205, 203                     | catechin              |  |
| 30 | 18   | C <sub>14</sub> H <sub>10</sub> O <sub>9</sub>  | 321.0259 (321.0252) | 2.163 | 169, 125                          | digallate             |  |

|    |      |                                                 |                     |       |                         |                                               |
|----|------|-------------------------------------------------|---------------------|-------|-------------------------|-----------------------------------------------|
| 31 | 18.4 | C <sub>8</sub> H <sub>8</sub> O <sub>5</sub>    | 183.0313 (183.0298) | 7.655 | 168, 124                | gallic acid methyl ester                      |
| 32 | 18.6 | C <sub>20</sub> H <sub>20</sub> O <sub>13</sub> | 467.0862 (467.0831) | 6.606 | 315, 297, 169, 125      | 3,6-di- <i>O</i> -galloyl-1,5-anhydroglucitol |
| 33 | 18.9 | C <sub>20</sub> H <sub>20</sub> O <sub>14</sub> | 483.0813 (483.0780) | 6.771 | 465, 331, 313, 169, 125 | digalloyl hexoside                            |
| 34 | 19.1 | C <sub>20</sub> H <sub>20</sub> O <sub>13</sub> | 467.0865 (467.0831) | 7.248 | 315, 169, 125           | digalloyl deoxyhexoside                       |
| 35 | 19.6 | C <sub>20</sub> H <sub>20</sub> O <sub>13</sub> | 467.0869 (467.0831) | 8.104 | 315, 297, 169, 125      | maplexin D                                    |
| 36 | 19.9 | C <sub>21</sub> H <sub>18</sub> O <sub>13</sub> | 477.0704 (477.0674) | 6.153 | 325, 201, 173, 169, 125 | digalloyl shikimic acid                       |
| 37 | 20.4 | C <sub>20</sub> H <sub>20</sub> O <sub>14</sub> | 483.0812 (483.0780) | 6.564 | 331, 313, 169, 125      | digalloyl hexoside                            |
| 38 | 21   | C <sub>15</sub> H <sub>14</sub> O <sub>6</sub>  | 289.0724 (289.0717) | 2.207 | 245, 205, 203           | epicatechin                                   |
| 39 | 21.3 | C <sub>20</sub> H <sub>20</sub> O <sub>13</sub> | 467.0868 (467.0831) | 7.89  | 423, 315, 169, 152, 125 | digalloyl deoxyhexoside                       |
| 40 | 22   | C <sub>20</sub> H <sub>20</sub> O <sub>13</sub> | 467.0856 (467.0831) | 5.321 | 315, 297, 211, 169, 125 | ginnalin A                                    |
| 41 | 22.9 | C <sub>27</sub> H <sub>24</sub> O <sub>17</sub> | 619.0973 (619.0940) | 5.212 | 467, 315, 297, 169, 125 | trigalloyl deoxyhexoside                      |



|    |      |                                                 |                     |       |                                                            |                                                 |
|----|------|-------------------------------------------------|---------------------|-------|------------------------------------------------------------|-------------------------------------------------|
| 42 | 23.6 | C <sub>21</sub> H <sub>22</sub> O <sub>13</sub> | 481.1002 (481.0987) | 2.983 | 315, 169, 125                                              | galloyl methylgalloyl<br>deoxyhexoside          |
| 43 | 23.7 | C <sub>27</sub> H <sub>24</sub> O <sub>17</sub> | 619.0975 (619.0940) | 5.535 | 467, 315, 169, 125                                         | trigalloyl deoxyhexoside                        |
| 44 | 24.4 | C <sub>27</sub> H <sub>24</sub> O <sub>17</sub> | 619.0973 (619.0940) | 5.212 | 467, 315, 297, 169, 125                                    | trigalloyl deoxyhexoside                        |
| 45 | 24.9 | C <sub>26</sub> H <sub>28</sub> O <sub>16</sub> | 595.1333 (595.1304) | 4.774 | 301, 300, 271, 255, 243, 227, 179, 151                     | quercetin hexosyl<br>pentoside                  |
| 46 | 25.7 | C <sub>28</sub> H <sub>24</sub> O <sub>16</sub> | 615.1035 (615.0991) | 7.058 | 463, 301, 300, 271, 255, 243, 227, 211, 179, 169, 151, 125 | quercetin-3- <i>O</i> -galloyl<br>hexoside      |
| 47 | 26   | C <sub>9</sub> H <sub>10</sub> O <sub>5</sub>   | 197.0460 (197.0455) | 2.298 | 182, 167, 123                                              | di-methyl gallic acid                           |
| 48 | 26.5 | C <sub>28</sub> H <sub>24</sub> O <sub>16</sub> | 615.1042 (615.0991) | 8.196 | 463, 301, 300, 271, 255, 243, 227, 211, 179, 169, 151, 125 | quercetin-3- <i>O</i> -galloyl<br>hexoside      |
| 49 | 27   | C <sub>14</sub> H <sub>5</sub> O <sub>8</sub>   | 300.9996 (300.9989) | 2.024 | 284, 257, 229, 201, 185, 173, 145,                         | ellagic acid                                    |
| 50 | 27.4 | C <sub>27</sub> H <sub>30</sub> O <sub>16</sub> | 609.1496 (609.1461) | 5.731 | 301, 300, 271, 255, 243, 151                               | quercetin-3- <i>O</i> -hexosyl<br>deoxyhexoside |
| 51 | 27.7 | C <sub>9</sub> H <sub>10</sub> O <sub>5</sub>   | 197.0461 (197.0455) | 2.806 | 182, 167, 123                                              | 5-methyl gallic acid<br>methyl ester            |
| 52 | 27.8 | C <sub>22</sub> H <sub>18</sub> O <sub>10</sub> | 441.0857 (441.0827) | 6.755 | 289, 245, 169, 125                                         | galloyl (epi)catechin                           |

|    |      |                                                 |                     |       |                                                            |                                  |
|----|------|-------------------------------------------------|---------------------|-------|------------------------------------------------------------|----------------------------------|
| 53 | 28.1 | C <sub>27</sub> H <sub>24</sub> O <sub>17</sub> | 619.0977 (619.0940) | 5.858 | 467, 315, 297, 169, 125                                    | trigalloyl deoxyhexoside         |
| 54 | 28.6 | C <sub>22</sub> H <sub>18</sub> O <sub>10</sub> | 441.0858 (441.0827) | 7.208 | 289, 245, 169, 125                                         | galloyl (epi)catechin            |
| 55 | 29.2 | C <sub>28</sub> H <sub>24</sub> O <sub>16</sub> | 615.1021(615.0991)  | 7.708 | 463, 313, 301, 273, 255, 245, 229, 211, 179, 169, 151, 125 | quercetin galloyl hexoside       |
| 56 | 29.2 | C <sub>27</sub> H <sub>24</sub> O <sub>17</sub> | 619.0975 (619.0940) | 5.535 | 467, 315, 297, 169, 125                                    | trigalloyl deoxyhexoside         |
| 57 | 29.9 | C <sub>27</sub> H <sub>24</sub> O <sub>17</sub> | 619.0978 (619.0940) | 3.727 | 467, 449, 315, 297, 169, 125                               | trigalloyl deoxyhexoside         |
| 58 | 30   | C <sub>28</sub> H <sub>24</sub> O <sub>16</sub> | 615.1039(615.0991)  | 4.782 | 463, 313, 301, 273, 255, 245, 229, 211, 179, 169, 151, 125 | quercetin galloyl hexoside       |
| 59 | 31.9 | C <sub>20</sub> H <sub>18</sub> O <sub>11</sub> | 433.0808(433.0776)  | 7.307 | 301, 300, 271, 255, 243, 151                               | quercetin-3- <i>O</i> -pentoside |
| 60 | 32.2 | C <sub>21</sub> H <sub>20</sub> O <sub>11</sub> | 447.0956 (447.0932) | 5.177 | 285, 284, 255, 227                                         | kaempferol-3- <i>O</i> -hexoside |
| 61 | 32.5 | C <sub>15</sub> H <sub>12</sub> O <sub>9</sub>  | 335.0430 (335.0408) | 6.4   | 183, 168, 124                                              | methyl digallate                 |
| 62 | 33   | C <sub>34</sub> H <sub>28</sub> O <sub>21</sub> | 771.1099 (771.1050) | 6.313 | 619, 467, 449, 315, 297, 169, 125                          | tetragalloyl deoxyhexoside       |
| 63 | 33.5 | C <sub>29</sub> H <sub>22</sub> O               | 593.0966 (593.0936) | 4.924 | 441, 289, 271, 245, 203, 169, 125                          | digalloyl (epi)catechin          |

14

|    |      |                                                 |                     |       |                                        |                                       |
|----|------|-------------------------------------------------|---------------------|-------|----------------------------------------|---------------------------------------|
| 64 | 34.3 | C <sub>21</sub> H <sub>20</sub> O <sub>11</sub> | 447.0953 (447.0932) | 4.506 | 301, 300, 271, 255, 243, 227, 151      | quercetin-3- <i>O</i> -deoxyhexoside  |
| 65 | 34.8 | C <sub>34</sub> H <sub>28</sub> O <sub>21</sub> | 771.1108 (771.1050) | 7.48  | 619, 467, 315, 297, 169, 125           | tetragalloyl deoxyhexoside            |
| 66 | 35.2 | C <sub>28</sub> H <sub>26</sub> O <sub>17</sub> | 633.1142 (633.1097) | 7.071 | 467, 315, 297, 169, 125                | digalloyl methylgalloyl deoxyhexoside |
| 67 | 35.4 | C <sub>27</sub> H <sub>22</sub> O <sub>15</sub> | 585.0909 (585.0885) | 3.941 | 433, 301, 273, 255, 179, 151           | quercetin galloyl pentoside           |
| 68 | 35.5 | C <sub>34</sub> H <sub>28</sub> O <sub>21</sub> | 771.1101 (771.1050) | 6.572 | 619, 467, 315, 297, 169, 125           | tetragalloyl deoxyhexoside            |
| 69 | 35.9 | C <sub>28</sub> H <sub>26</sub> O <sub>17</sub> | 633.1113 (633.1097) | 2.49  | 467, 315, 297, 169, 125                | digalloyl methylgalloyl deoxyhexoside |
| 70 | 36   | C <sub>20</sub> H <sub>18</sub> O <sub>10</sub> | 417.0843 (417.0827) | 3.787 | 285, 284, 255, 227                     | kaempferol-3- <i>O</i> -pentoside     |
| 71 | 36.2 | C <sub>29</sub> H <sub>22</sub> O <sub>14</sub> | 593.0960 (593.0936) | 3.913 | 441, 423, 289, 271, 245, 203, 169, 125 | digalloyl (epi)catechin               |
| 72 | 36.2 | C <sub>34</sub> H <sub>28</sub> O <sub>21</sub> | 771.1096 (771.1050) | 5.924 | 619, 467, 315, 297, 169, 125           | tetragalloyl deoxyhexoside            |
| 73 | 36.7 | C <sub>28</sub> H <sub>26</sub> O <sub>17</sub> | 633.1140 (633.1097) | 6.755 | 467, 315, 297, 169, 125                | digalloyl methylgalloyl deoxyhexoside |

|    |      |                                                 |                     |       |                                              |                                             |
|----|------|-------------------------------------------------|---------------------|-------|----------------------------------------------|---------------------------------------------|
| 74 | 37.5 | C <sub>34</sub> H <sub>28</sub> O <sub>21</sub> | 771.1085 (771.1050) | 4.497 | 619, 467, 315, 297, 169, 125                 | tetragalloyl<br>deoxyhexoside               |
| 75 | 38.6 | C <sub>34</sub> H <sub>28</sub> O <sub>21</sub> | 771.1098 (771.1050) | 6.183 | 619, 467, 315, 297, 169, 125                 | tetragalloyl<br>deoxyhexoside               |
| 76 | 39.8 | C <sub>29</sub> H <sub>22</sub> O <sub>14</sub> | 593.0967 (593.0936) | 5.093 | 441, 289, 271, 245, 203, 169, 125            | digalloyl (epi)catechin                     |
| 77 | 40.9 | C <sub>21</sub> H <sub>20</sub> O <sub>10</sub> | 431.1001 (431.0983) | 4.011 | 285, 284, 255, 227                           | kaempferol-3- <i>O</i> -<br>deoxyhexoside   |
| 78 | 40.9 | C <sub>29</sub> H <sub>22</sub> O <sub>14</sub> | 593.0969 (593.0936) | 5.43  | 441, 289, 271, 245, 203, 169, 125            | digalloyl (epi)catechin                     |
| 79 | 41   | C <sub>41</sub> H <sub>32</sub> O <sub>25</sub> | 923.1163 (923.1159) | 0.335 | 771, 619, 467, 315, 297, 169, 125            | pentagalloyl<br>deoxyhexoside               |
| 80 | 41.1 | C <sub>27</sub> H <sub>22</sub> O <sub>15</sub> | 585.0934 (585.0885) | 8.214 | 433, 301, 300, 271, 255, 179, 151            | quercetin-3- <i>O</i> -galloyl<br>pentoside |
| 81 | 41.3 | C <sub>29</sub> H <sub>22</sub> O <sub>14</sub> | 593.0967 (593.0936) | 5.093 | 441, 289, 271, 245, 203, 169, 125            | digalloyl (epi)catechin                     |
| 82 | 42   | C <sub>41</sub> H <sub>32</sub> O <sub>25</sub> | 923.1230 (923.1159) | 7.593 | 771, 619, 467, 315, 297, 169, 125            | pentagalloyl<br>deoxyhexoside               |
| 83 | 42.4 | C <sub>22</sub> H <sub>16</sub> O <sub>13</sub> | 487.0547 (487.0518) | 5.924 | 335, 183, 168, 124                           | methyl trigallate                           |
| 84 | 42.8 | C <sub>28</sub> H <sub>24</sub> O               | 599.1055 (599.1042) | 2.096 | 447, 315, 301, 300, 271, 255, 243, 227, 179, | quercetin-3- <i>O</i> -galloyl              |

|    |      |                                                 |                     |       |                                        |  |                                           |
|----|------|-------------------------------------------------|---------------------|-------|----------------------------------------|--|-------------------------------------------|
|    |      | 15                                              |                     |       | 151                                    |  | deoxyhexoside                             |
| 85 | 43.4 | C <sub>35</sub> H <sub>30</sub> O <sub>21</sub> | 785.1257 (785.1206) | 6.391 | 633, 619, 467, 315, 297, 169, 125      |  | trigalloyl methylgalloyl<br>deoxyhexoside |
| 86 | 44.3 | C <sub>16</sub> H <sub>14</sub> O <sub>9</sub>  | 349.0574 (349.0565) | 2.562 | 197, 182, 167, 123                     |  | di-methyl digallate                       |
| 87 | 46.5 | C <sub>28</sub> H <sub>24</sub> O <sub>15</sub> | 599.1088 (599.1042) | 7.604 | 447, 301, 255, 179, 151                |  | quercetin galloyl<br>deoxyhexoside        |
| 88 | 47.3 | C <sub>28</sub> H <sub>24</sub> O <sub>15</sub> | 599.1078 (599.1042) | 3.556 | 447, 301, 255, 179, 151                |  | quercetin galloyl<br>deoxyhexoside        |
| 89 | 53   | C <sub>35</sub> H <sub>28</sub> O <sub>19</sub> | 751.1214 (751.1152) | 8.251 | 599, 447, 301, 255, 179, 151           |  | quercetin digalloyl<br>deoxyhexoside      |
| 90 | 53.5 | C <sub>28</sub> H <sub>24</sub> O <sub>14</sub> | 583.1144 (583.1093) | 8.696 | 431, 297, 285, 255, 227                |  | kaempferol galloyl<br>deoxyhexoside       |
| 91 | 53.8 | C <sub>35</sub> H <sub>28</sub> O <sub>19</sub> | 751.1208 (751.1152) | 7.452 | 599, 447, 301, 255, 179, 151           |  | quercetin digalloyl<br>deoxyhexoside      |
| 92 | 54.5 | C <sub>28</sub> H <sub>24</sub> O <sub>14</sub> | 583.1133 (583.1093) | 6.809 | 431, 297, 285, 255, 227, 169, 125      |  | kaempferol galloyl<br>deoxyhexoside       |
| 93 | 55.1 | C <sub>35</sub> H <sub>28</sub> O <sub>19</sub> | 751.1205 (751.1152) | 7.052 | 599, 447, 301, 255, 179, 151           |  | quercetin digalloyl<br>deoxyhexoside      |
| 94 | 59.6 | C <sub>35</sub> H <sub>28</sub> O <sub>18</sub> | 735.1258 (735.1202) | 7.498 | 583, 431, 297, 285, 255, 227, 169, 125 |  | kaempferol digalloyl<br>deoxyhexoside     |
